# Supplementary material for: The role of the surface smear microbiome in the development of defective smear on surface-ripened red-smear cheese
Source: PubMed Central journal article supplement (PMC6613336; doi:10.3934/microbiol.2018.4.622), 2018-10-25
Supplement: microbiol-04-04-622-s001.pdf [file microbiol-04-04-622-s001.pdf]

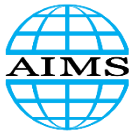

*Research article*

## **The role of the surface smear microbiome in the development of defective smear on surface-ripened red-smear cheese**

**Jasmine S. Ritschard<sup>1,†</sup>, Lea Amato<sup>2,†</sup>, Yadhu Kumar<sup>3</sup>, Britta Müller<sup>3</sup>, Leo Meile<sup>2</sup> and Markus Schuppler<sup>1,\*</sup>**

<sup>1</sup> Laboratory of Food Microbiology, Institute of Food, Nutrition and Health, ETH Zurich, Schmelzbergstrasse 7, 8092 Zurich, Switzerland

<sup>2</sup> Laboratory of Food Biotechnology, Institute of Food, Nutrition and Health, ETH Zurich, Schmelzbergstrasse 7, 8092 Zurich, Switzerland

<sup>3</sup> Eurofins GATC Biotech AG, Jakob-Stadler-Platz 7, 78467 Konstanz, Germany

\* **Correspondence:** Email: [markus.schuppler@hest.ethz.ch](mailto:markus.schuppler@hest.ethz.ch); Tel: +41446327862; Fax: +41446321266.

† These two authors contributed equally.

---

## Supplementary

**Table S1.** Related to Figure 3. Relative abundances of 16S rDNA amplicons determined by next-generation sequencing of cheese smear samples.

| Phylum                | Genus                             | Unpacked               | Vacuum film-prepacked       | Vacuum                                    |
|-----------------------|-----------------------------------|------------------------|-----------------------------|-------------------------------------------|
|                       |                                   | 14413 reads            | non-defective<br>7708 reads | film-prepacked<br>defective<br>7910 reads |
|                       |                                   | Relative abundance (%) |                             |                                           |
|                       |                                   | rDNA                   | rDNA                        | rDNA                                      |
|                       | other taxa (n = 105) <sup>a</sup> | 7.19                   | 9.80                        | 9.27                                      |
| <i>Firmicutes</i>     | <i>Staphylococcus</i>             | 16.83                  | 14.22                       | 4.20                                      |
|                       | <i>Alkalibacterium</i>            | 3.50                   | 6.23                        | 1.64                                      |
|                       | <i>Facklamia</i>                  | 2.14                   | 2.71                        | 1.98                                      |
|                       | <i>Lactobacillus</i>              | 1.42                   | 0.19                        | 0.09                                      |
|                       | <i>Sporosalibacterium</i>         | 0.07                   | 0.65                        | 0.21                                      |
| <i>Actinobacteria</i> | <i>Corynebacterium</i>            | 17.92                  | 21.95                       | 24.73                                     |
|                       | <i>Brevibacterium</i>             | 4.74                   | 4.46                        | 1.18                                      |
|                       | <i>Brachybacterium</i>            | 1.33                   | 1.50                        | 0.63                                      |
|                       | <i>Agrococcus</i>                 | 0.95                   | 0.40                        | 0.52                                      |
|                       | <i>Pseudoclavibacter</i>          | 1.67                   | 2.11                        | 0.68                                      |
|                       | <i>Leucobacter</i>                | 12.13                  | 5.76                        | 3.55                                      |
|                       | <i>Humibacter</i>                 | 3.17                   | 2.74                        | 0.73                                      |
|                       | <i>Trueperella</i>                | 0.42                   | 0.80                        | 0.33                                      |
|                       | <i>Bogoriella</i>                 | 0.44                   | 0.54                        | 0.25                                      |
| <i>Proteobacteria</i> | <i>Halomonas</i>                  | 5.63                   | 10.56                       | 16.92                                     |
|                       | <i>Psychrobacter</i>              | 0.86                   | 2.26                        | 8.53                                      |
|                       | <i>Herbaspirillum</i>             | 3.58                   | 5.70                        | 7.40                                      |
|                       | <i>Sphingomonas</i>               | 1.28                   | 1.80                        | 2.25                                      |
|                       | <i>Fulvimonas</i>                 | 0.03                   | 1.35                        | 0.10                                      |
| <i>Bacteroidetes</i>  | <i>Sphingobacterium</i>           | 1.37                   | 1.06                        | 5.27                                      |
|                       | <i>Hydrotalea</i>                 | 0.00                   | 0.00                        | 1.73                                      |
|                       | <i>Marinifilum</i>                | 0.00                   | 0.09                        | 0.86                                      |
| <i>Tenericutes</i>    | <i>Asteroleplasma</i>             | 0.00                   | 0.00                        | 0.75                                      |
| <i>Crenarchaeota</i>  | <i>Thermocladium</i>              | 9.37                   | 1.60                        | 1.74                                      |
|                       | <i>Sulfurisphaera</i>             | 0.17                   | 0.09                        | 0.63                                      |
| <i>Euryarchaeota</i>  | <i>Methanohalobium</i>            | 3.75                   | 1.41                        | 3.26                                      |
|                       | <i>Methanomicrobium</i>           | 0.03                   | 0.00                        | 0.56                                      |

<sup>a</sup>Summary of the relative abundances of taxa revealing less than 0.5% of total reads in each of the smear samples analyzed.

**Table S2.** Related to Figure 4. Relative abundances of 16S rRNA reads determined by next-generation sequencing of cheese smear samples.

| Phylum                 | Genus                            | Unpacked   | Vacuum         | Vacuum         |
|------------------------|----------------------------------|------------|----------------|----------------|
|                        |                                  | 2774 reads | film-prepacked | film-prepacked |
|                        |                                  |            | non-defective  | defective      |
|                        |                                  | 2774 reads | 2518 reads     | 2285 reads     |
| Relative abundance (%) |                                  |            |                |                |
|                        |                                  | rRNA       | rRNA           | rRNA           |
|                        | other taxa (n = 28) <sup>a</sup> | 2.81       | 4.13           | 4.38           |
| <i>Firmicutes</i>      | <i>Staphylococcus</i>            | 1.66       | 17.00          | 2.84           |
|                        | <i>Alkalibacterium</i>           | 0.65       | 4.13           | 1.36           |
|                        | <i>Facklamia</i>                 | 0.43       | 1.43           | 0.70           |
|                        | <i>Salirhabdus</i>               | 0.00       | 0.75           | 0.00           |
|                        | <i>Sporanaerobacter</i>          | 0.00       | 1.19           | 0.48           |
| <i>Actinobacteria</i>  | <i>Corynebacterium</i>           | 22.06      | 26.25          | 21.66          |
|                        | <i>Brevibacterium</i>            | 29.45      | 14.18          | 17.77          |
|                        | <i>Brachybacterium</i>           | 13.70      | 5.36           | 5.60           |
|                        | <i>Agrococcus</i>                | 7.43       | 3.22           | 4.03           |
|                        | <i>Clavibacter</i>               | 2.92       | 1.15           | 4.81           |
|                        | <i>Plantibacter</i>              | 2.52       | 2.86           | 3.28           |
|                        | <i>Pseudoclavibacter</i>         | 2.34       | 2.58           | 3.33           |
|                        | <i>Nesterenkonia</i>             | 2.09       | 2.50           | 2.28           |
|                        | <i>Klugiella</i>                 | 1.33       | 3.02           | 4.42           |
|                        | <i>Curtobacterium</i>            | 1.80       | 0.56           | 4.29           |
|                        | <i>Microbacterium</i>            | 1.01       | 1.07           | 1.18           |
|                        | <i>Georgenia</i>                 | 0.87       | 0.44           | 0.61           |
|                        | <i>Millisia</i>                  | 0.94       | 1.31           | 1.05           |
|                        | <i>Mycetocola</i>                | 0.87       | 0.91           | 1.62           |
|                        | <i>Leucobacter</i>               | 0.61       | 0.24           | 2.36           |
|                        | <i>Serinibacter</i>              | 0.47       | 1.55           | 1.53           |
|                        | <i>Actinobaculum</i>             | 0.43       | 0.75           | 1.01           |
|                        | <i>Frigoribacterium</i>          | 0.25       | 0.00           | 1.97           |
|                        | <i>Arcanobacterium</i>           | 0.00       | 0.83           | 0.83           |
|                        | <i>Quadrisphaera</i>             | 0.25       | 0.71           | 0.48           |
|                        | <i>Subtercola</i>                | 0.50       | 0.24           | 0.35           |
|                        | <i>Zimmermannella</i>            | 0.36       | 0.32           | 0.53           |
|                        | <i>Salinibacterium</i>           | 0.18       | 0.28           | 0.70           |
|                        | <i>Zhihengliuella</i>            | 0.00       | 0.52           | 0.48           |
| <i>Proteobacteria</i>  | <i>Halomonas</i>                 | 1.77       | 0.32           | 2.41           |
|                        | <i>Psychrobacter</i>             | 0.29       | 0.20           | 1.66           |

<sup>a</sup>Summary of the relative abundances of taxa revealing less than 0.5% of total reads in each of the smear samples analyzed.

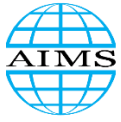

AIMS Press

© 2018 the Author(s), licensee AIMS Press. This is an open access article distributed under the terms of the Creative Commons Attribution License (<http://creativecommons.org/licenses/by/4.0>)
